# Supplementary material for: African Neurosurgery Research: A Scientometric Analysis of the Top 115 Most Cited Articles
Source: Research Square preprint supplement (doi:10.21203/rs.3.rs-564592/v1), 2021-06-02
Supplement: Supplementary file 1 [file 7c9debd7c022f5284c41b23d.docx]

**Article Title:** African neurosurgery research (Part I): Hierarchy of scientific evidence and thematic analysis

**Journal Name:** ActaNeurochirurgica

**Author Names:** Ulrick Sidney Kanmounye1,2, Stéphane Nguembu1,3, Yvan Zolo1,4, Dawin Sichimba1,5, Myron L. Rolle2, Adam Ammar2, Nourou Dine Adeniran Bankole1,6, Kantenga DM Kabulo1,7, Beverly Cheserem8,9, Kee B. Park2, Claire Karekezi10, Ignatius Esene11,12

**Affiliations:**

1 Department of Research, Association of Future African Neurosurgeons, Yaounde, Cameroon

2 Global Neurosurgery Initiative, Program in Global Surgery and Social Change, Harvard Medical School, Boston, MA, USA

3 Faculty of Medicine, Higher Institute of Health Sciences, Université des Montagnes, Bangangté, Cameroon

4 Faculty of Health Sciences, University of Buea, Buea, Cameroon

5 School of Medicine, Copperbelt University, Kitwe, Zambia

6 Neurosurgery Unit, Department of Surgical and Medico-surgical Sciences, Faculty of Medicine and Pharmacy of Rabat, Rabat, Morocco

7 Neurosurgery Unit, Department of Surgery, University of Zimbabwe, Harare, Zimbabwe

8 Weill Cornell Global Health Fellow in Neurosurgery. Muhimbili Orthopaedic Institute, Dar es Salaam, Tanzania

9 Department of Neurosurgery, Aga Khan University Hospital, Nairobi, Kenya

10 Department of Neurosurgery, Rwanda Military Hospital, Kigali, Rwanda

11 Department of Surgery, Faculty of Health Sciences, University of Bamenda, Bamenda, Cameroon

12 Neurosurgery Unit, Department of Surgery, Garoua Regional Hospital, Garoua, Cameroon

**Corresponding author:** Ulrick Sidney Kanmounye, Association of Future African Neurosurgeons, Immeuble Nziko, Mfoundi, Yaounde, Cameroon, [ulricksidney@gmail.com](mailto:ulricksidney@gmail.com)
